# Supplementary material for: LhANS-rr1, LhDFR, and LhMYB114 Regulate Anthocyanin Biosynthesis in Flower Buds of Lilium ‘Siberia’
Source: MDPI journal article supplement (doi:10.3390/genes14030559), 2023-02-23
Supplement: s1 [file s1]

Technical Terms:

6 CCoAOMT (caffeoyl-CoA3-methyl-transferase),  
UDPG (pyrophosphorylase),  
HCT (Hydroxycinnamoyltransferase) ,  
C4H (cinnamate 4-hydroxylase),  
4CL (4-coumaroyl-coenzyme A ligase),  
CHS (chalcone synthase),  
CHI (chalcone isomerase),  
F3H (flavonoid 3-hydroxylase),  
LhDFR (Lh-dihydroflavonol 4-reductase),  
LhANS-rr1 (Lh-anthocyanidin synthase),  
and UFGT (UDPG-flavonoid-3-O-glycosyltransferase).
