# Supplementary material for: LhANS-rr1, LhDFR, and LhMYB114 Regulate Anthocyanin Biosynthesis in Flower Buds of Lilium ‘Siberia’
Source: MDPI journal article supplement (doi:10.3390/genes14030559), 2023-02-23
Supplement: s1 [file s1]

**Table 1.** PCR primers used in the study.

| Primer      | Sequence (5'-3')            | Usage                             |
|-------------|-----------------------------|-----------------------------------|
| <i>LDF</i>  | ATGAGAGAATGTGAAAGGCCCCCGTG  | Gene cloning for <i>LhDFR</i>     |
| <i>LDR</i>  | TACTGAAGAGCAACGGAGACTTGT    |                                   |
| <i>LAcF</i> | ATGCCGACCGAGATCATGCCGTTGC   | Gene cloning for <i>LhANS-rr1</i> |
| <i>LAcR</i> | TCACTTGAGAGAAGTGAAGTCCTCC   |                                   |
| <i>M14F</i> | ATGAGGAAGACGCCTCGCACAAAGAG  | Gene cloning for <i>LhMYB114</i>  |
| <i>M14R</i> | TTAATCTCCAGTTATTAAATCAGAAAG |                                   |
| <i>CH1F</i> | AGTTCATCACCTTCACTGCCATCG    | qRT-PCR for CHI                   |
| <i>CH1R</i> | CGGAGTATTGTTGCCCAGTCAGTT    |                                   |
| <i>F3H</i>  | TTCTTGTGCCCAACGATGTCCCTG    | qRT-PCR for F3H                   |
| <i>F3R</i>  | GCCATGACATTTCGTGCCTTCTCCT   |                                   |
| <i>CC1F</i> | ACGACAACACGCTCTGGAATGG      | qRT-PCR for CCoAOMT-1             |
| <i>CC1R</i> | GGCAGGCAGCAACATATCACTT      |                                   |
| <i>C3F</i>  | ACTGCTGTCGTCAAAGAGTCCCT     | qRT-PCR for C3H                   |
| <i>C3R</i>  | CCAACGGGTTCTTCCACGCATT      |                                   |
| <i>CHF</i>  | GCATCACCAAGAGCGAGCATCTC     | qRT-PCR for CHS                   |
| <i>CHR</i>  | TACCATATCCTGGCGAGCGTCAAG    |                                   |
| <i>ANF</i>  | GGTGAACAAGGAGAGGGTCAGGAT    | qRT-PCR for LhANS-rr1             |
| <i>ANR</i>  | ATGCTGGATGTGCTGCTTCAAAGT    |                                   |
| <i>CC2F</i> | CGATGCCGACAAGGACAACCTACC    | qRT-PCR for CCoAOMT-2             |
| <i>CC2R</i> | TCAGCCGCCAATGCCTTATTCAG     |                                   |
| <i>CC3F</i> | CGATGCCGACAAGGACAACCTACCT   | qRT-PCR for CCoAOMT-3             |
| <i>CC3R</i> | CCACCACAGAGCCATTCCAGAGTG    |                                   |
| <i>C41F</i> | TGCTGCCATTGAAACAACCCTCTG    | qRT-PCR for C4H                   |
| <i>C41R</i> | TGTCGGGCTCAGTGATTTGGACTC    |                                   |
| <i>HCF</i>  | CAATGAAGTACACCGCCGCTACC     | qRT-PCR for HCT                   |
| <i>HCR</i>  | GCTGCTGAACTTGCTGTCTGAGG     |                                   |
| <i>C4F</i>  | CGATGCCGACAAGGACAACCTACC    | qRT-PCR for CCoAOMT-4             |
| <i>C4R</i>  | TCAGCCGCCAATGCCTTATTCAG     |                                   |
| <i>Ch2F</i> | ATGGATACACGGTCCGGGCTACTG    | qRT-PCR for LhDFR                 |
| <i>Ch2R</i> | AACATGGTACACACCGGAGCAACC    |                                   |
| <i>C5F</i>  | CGATGCCGACAAGGACAACCTACC    | qRT-PCR for CCoAOMT-5             |
| <i>C5R</i>  | TCAGCCGCCAATGCCTTATTCAG     |                                   |
| <i>C6F</i>  | CGATGCCGACAAGGACAACCTACC    | qRT-PCR for CCoAOMT-6             |
| <i>C6R</i>  | TCAGCCGCCAATGCCTTATTCAG     |                                   |
| <i>4CF</i>  | GATTGTCGTGGAGCTGGCGAAGAG    | qRT-PCR for 4CL                   |
| <i>4CR</i>  | GTCATCCCGTAACCCTGCCCAAGT    |                                   |

|                 |                                                |                            |
|-----------------|------------------------------------------------|----------------------------|
| <i>UDF</i>      | CTCACGGCGTCAAGACCACCATT                        | qRT-PCR for UDPG           |
| <i>UDR</i>      | ACGTTCTCGCAGCCTTCAGGAAG                        |                            |
| <i>LhActinF</i> | GCATCACACCTTCTACAACG                           | Reference gene             |
| <i>LhActinR</i> | GAAGAGCATAACCCTCATAGA                          |                            |
| <i>MTRF</i>     | TGAGTAAGGTTACCGGAATTCTGGCAATACTTCTGATTCGTCCTC  | Fragment amplification for |
| <i>MTRR</i>     | GGGACATGCCCCGGGCCTCGAGCATCTCAATGTACCGTGCTTCTCT | TRV of <i>LhMYB114</i>     |
| <i>LavF</i>     | TGAGTAAGGTTACCGGAATTCCGACGAAGCCTTGAAGTTGAAC    | Fragment amplification for |
| <i>LavR</i>     | GGGACATGCCCCGGGCCTCGAGCCAATCCTCTGCTGCCTTCTT    | TRV of <i>LhANS-rr1</i>    |
| <i>LDvF</i>     | TGAGTAAGGTTACCGGAATTCGTGCTAGTGGCTATGTTGGTT     | Fragment amplification for |
| <i>LDvR</i>     | GGGACATGCCCCGGGCCTCGAGGCTCTCATCCTCGCTAAGATC    | TRV of <i>LhANS-rr1</i>    |
