# Supplementary figures and images for: LhANS-rr1, LhDFR, and LhMYB114 Regulate Anthocyanin Biosynthesis in Flower Buds of Lilium ‘Siberia’
Source: MDPI journal article supplement (doi:10.3390/genes14030559), 2023-02-23

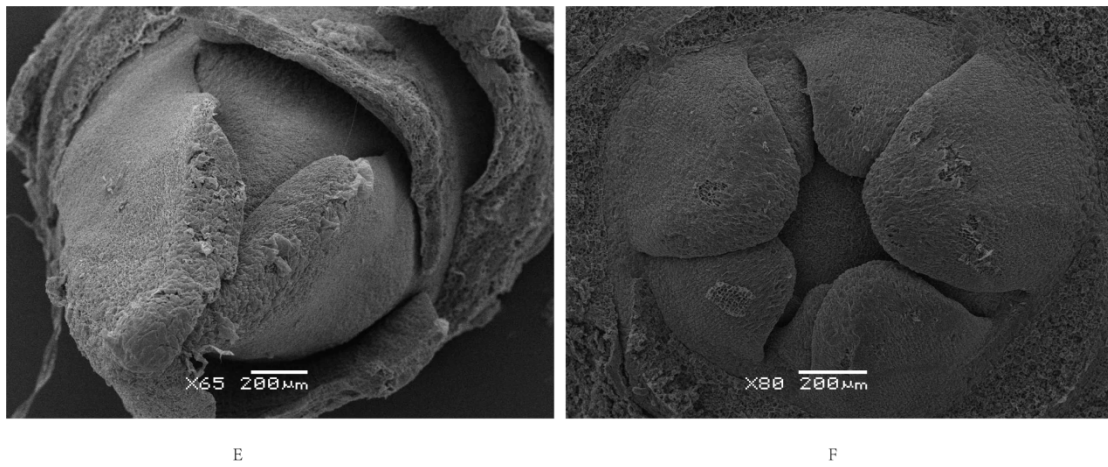

Figure S1. The microscopic view of epical meristem of Lilium hybrid 'Siberia' at E and F stage.

Supplement: s1 [file s1]
